# Supplementary material
Source: Springer Nature journal article supplement (https://www.springermedizin.de/resource/supplementary/12876_2014_1119_MOESM3_ESM.docx/9438516)
Supplement: MOESM3 [file 9438516]

| **Pol** | **Mutation Frequency (%)** |  | **HBsAg** | **Mutation Frequency (%)** |
| --- | --- | --- | --- | --- |
| rt:G_52_A | 29 |  | HBsAg:G_43_A | 29 |
| rt:P_95_Q | 15 |  | HBsAg:E_44_P | 29 |
| rt:H_122_F | 10 |  | HBsAg:T_46_A | 33 |
| rt:N_124_H | 10 |  | HBsAg:L_87_R | 15 |
| rt:H_126_R | 10 |  |  |  |
| rt:Y_221_F | 25 |  |  |  |
| rt:L_231_V | 17 |  |  |  |
| rt:V_278_A | 23 |  |  |  |
| rt:D_283_E | 96 |  |  |  |
